# Supplementary material for: Flavones induce neutrophil apoptosis by down-regulation of Mcl-1 via a proteasomal-dependent pathway
Source: PubMed Central journal article supplement — FASEB J. 2013 Mar;27(3):1084–94. doi: 10.1096/fj.12-218990 (PMC3574292; doi:10.1096/fj.12-218990), 2013-03
Supplement: supp_fj.12-218990_12-218990SuppFigure1.pdf [file supp_fj.12-218990_12-218990SuppFigure1.pdf]

# Supplementary Figure 1

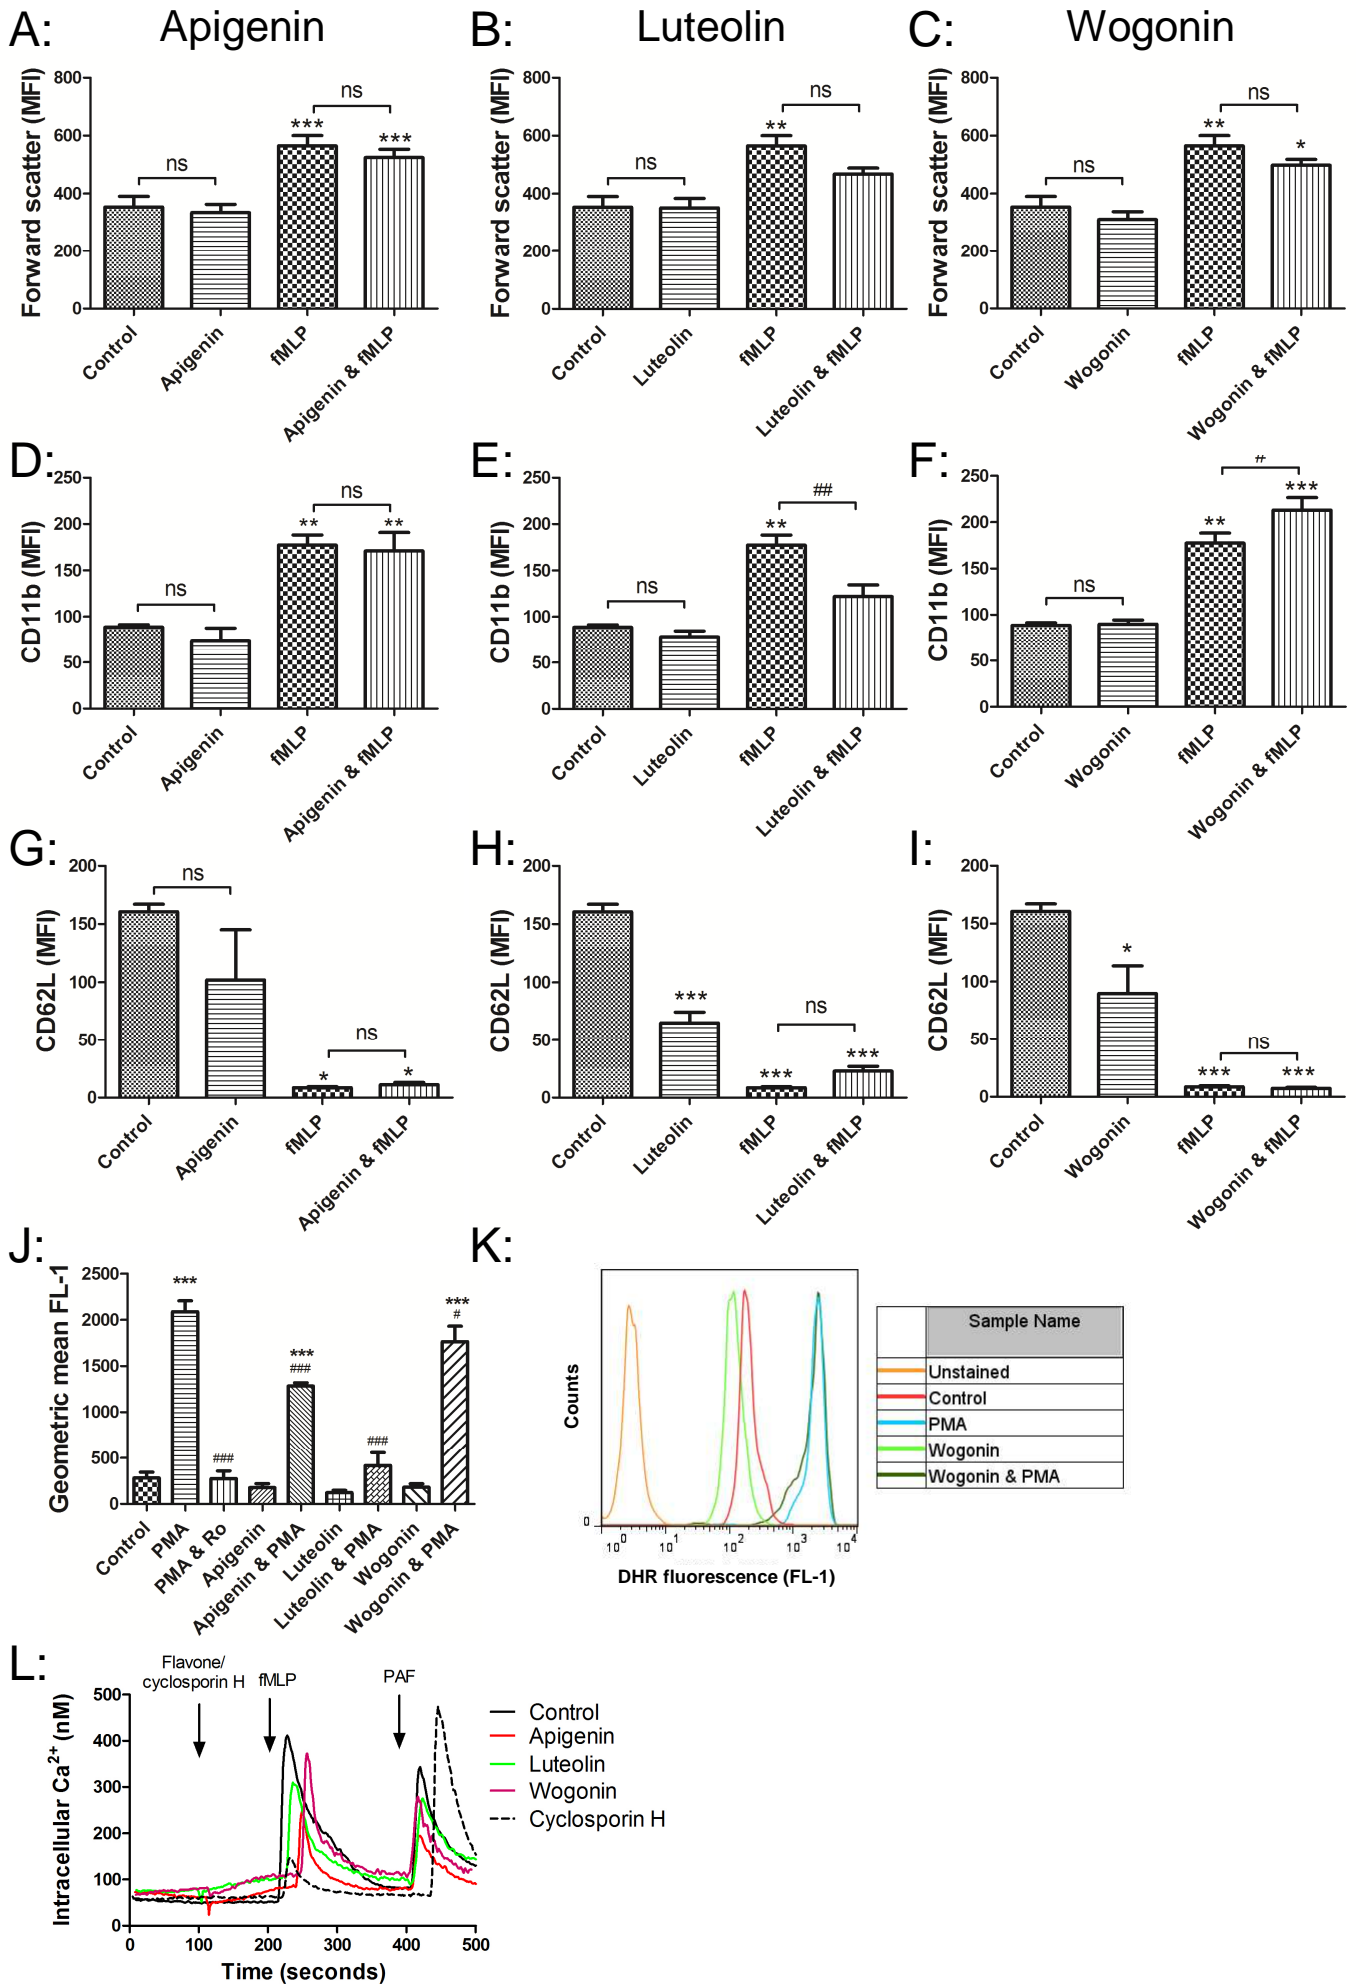

## Supplementary Figure 1

### **Supplementary Fig. 1 Effect of flavones on neutrophil activation.**

Neutrophils were cultured in the presence of the flavones apigenin (50 $\mu$ M), luteolin (50 $\mu$ M), wogonin (50 $\mu$ M) or control for 30mins prior to stimulation with fMLP (100nM) or control media for a further 15mins before flow cytometric analysis of shape change (A-C), CD11b upregulation (D-F) and CD62 (L-selectin) shedding (G-I) (all n=3) (MFI – mean fluorescent intensity). Data expressed as mean  $\pm$  SEM, analysed by ANOVA with a Newman-Keuls multiple comparison test, \*p<0.05, \*\*p<0.01, \*\*\*p<0.001 compared to control; #p<0.05, ##p<0.01 compared to fMLP treated sample. Neutrophils were pretreated with the flavones apigenin (50 $\mu$ M), luteolin (50 $\mu$ M), wogonin (50 $\mu$ M) or the protein kinase C inhibitor Ro 31-8220 (Ro; 1 $\mu$ M) for 30mins prior to stimulation with PMA (300nM) or control for a further 15mins and measurement of reactive species generation by dihydrorhodamine fluorescence (FL-1). Cumulative data (n=3) is shown (J), with an example flow cytometric plot (FL-1 histogram) shown in (K). Data expressed as mean  $\pm$  SEM, analysed by ANOVA with a Newman-Keuls multiple comparison test, \*\*\*p<0.001 compared to control; #p<0.05, ###p<0.001 compared to PMA treated sample. Representative trace from two separate experiments of intracellular calcium flux measured by spectrofluorimetry of fura-2 loaded neutrophils (L). The flavones apigenin (50 $\mu$ M), luteolin (50 $\mu$ M), wogonin (50 $\mu$ M), cyclosporine H (1 $\mu$ M) or control media was added at 120s, fMLP (100nM) was added at 210s and platelet-activating factor (PAF; 100nM) added at 400s.
